# Supplementary material for: Bidentate aliphatic quaternary ammonium ligand-stabilized CsPbBr3perovskite nanocrystals with high PLQY (92.3%) and superior stability
Source: Royal Society of Chemistry journal article supplement (doi:10.1039/d2tc01144a), 2022-01-01
Supplement: d2tc01144a1.pdf [file d2tc01144a1.pdf]

## Supporting Information:

### **Bidentate Aliphatic Quaternary Ammonium Ligand- Stabilized CsPbBr<sub>3</sub> Perovskite Nanocrystals with High PLQY (92.3%) and Superior Stability**

Ye Li,<sup>a</sup> Miaoling Cai,<sup>a</sup> Mengling Shen,<sup>a</sup> Yuting Cai<sup>\*a</sup> and Rong-Jun Xie<sup>\*ab</sup>

<sup>a</sup>. *College of Materials, Xiamen University, Xiamen 361005, China.*

<sup>b</sup>. *State Key Laboratory of Physical Chemistry of Solids, Xiamen 361005, China.*

E-mail: rjxie@xmu.edu.cn, ytcai@xmu.edu.cn

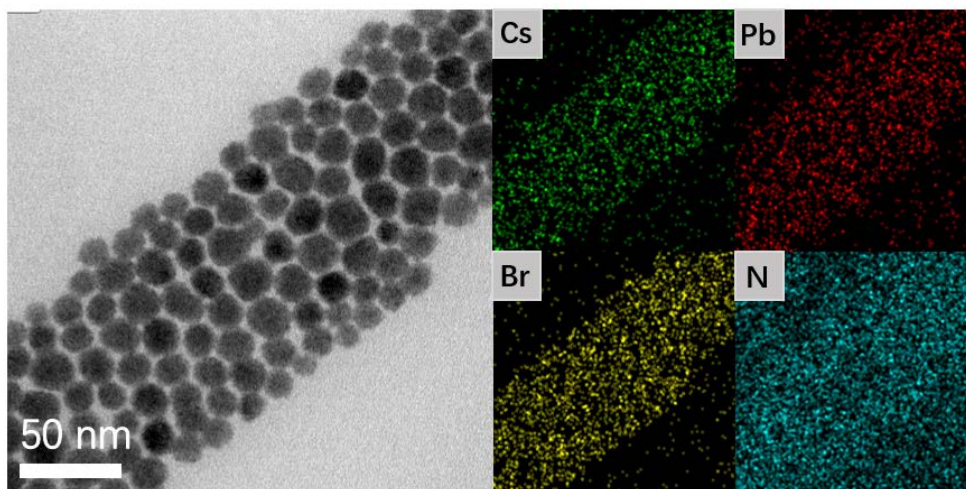

Fig. S1 Element mapping images of DTDB-CsPbBr<sub>3</sub> NCs.

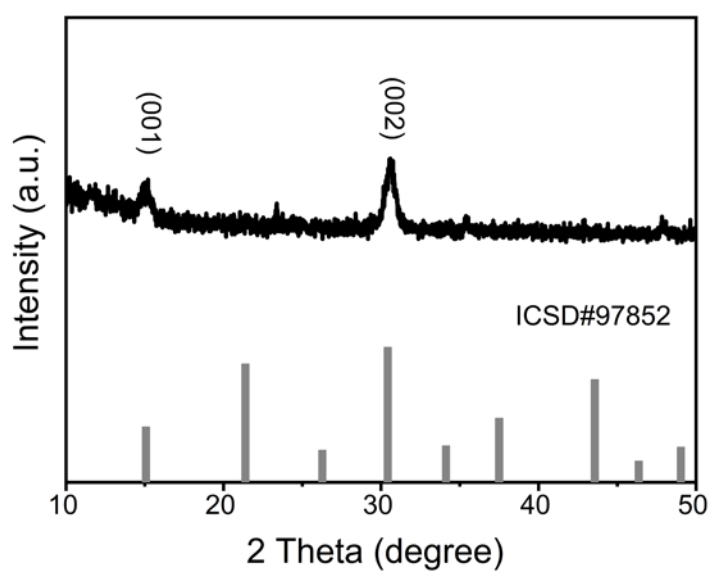

Fig. S2 XRD pattern of DTAB-CsPbBr<sub>3</sub> NCs.

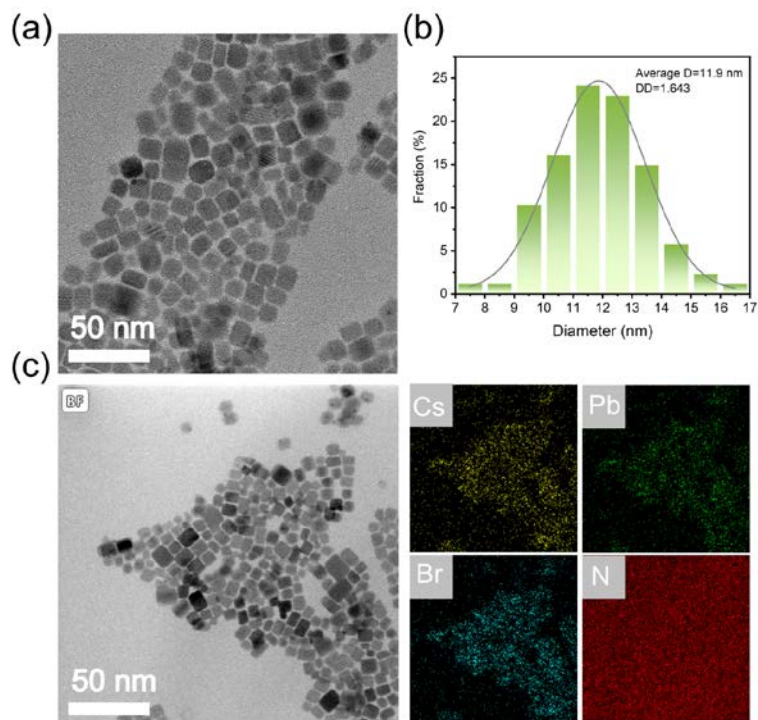

**Fig. S3** (a) TEM images of DTAB-CsPbBr<sub>3</sub> NCs. (b) particle size distribution of DTAB-CsPbBr<sub>3</sub> NCs. (c) Element mapping images of DTAB-CsPbBr<sub>3</sub> NCs.

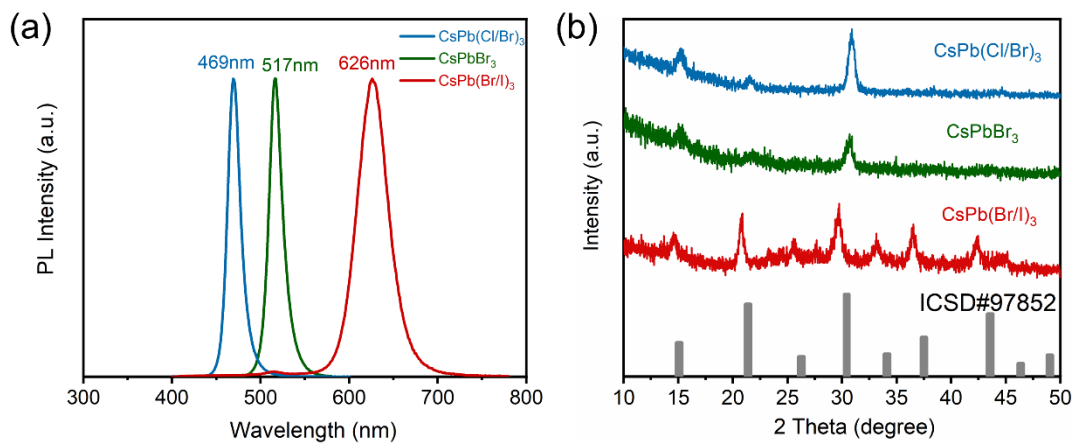

**Fig. S4** (a) PL spectra of DTDB-CsPbBr<sub>3</sub>, DTDB-CsPbBrCl<sub>2</sub> and DTDB-CsPbBr<sub>0.6</sub>I<sub>2.4</sub> NCs ( $\lambda_{\text{ex}} = 450$  nm) and (b) XRD patterns.

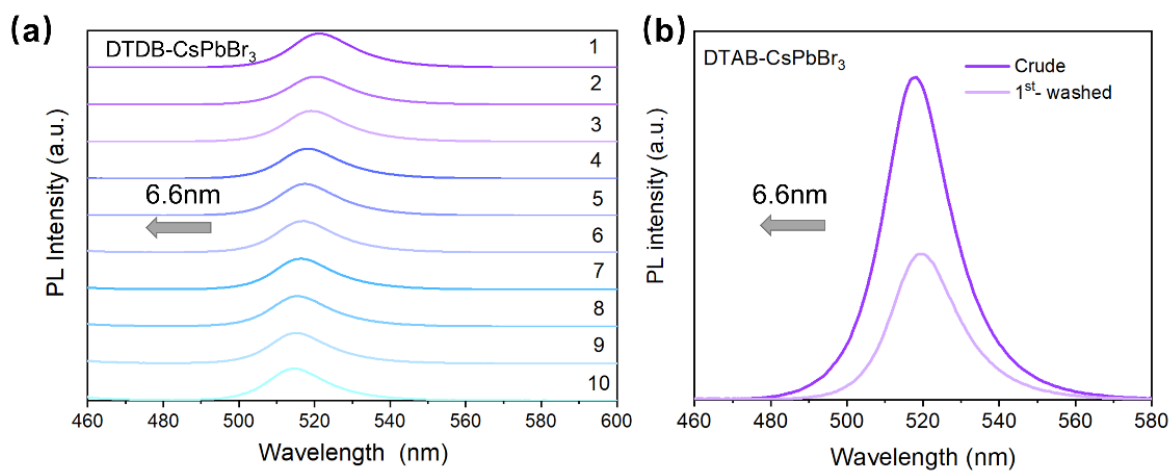

**Fig. S5** PL spectra of DTDB-CspbBr<sub>3</sub> (a) and DTAB-CspbBr<sub>3</sub> NCs (b) during the purification processes.

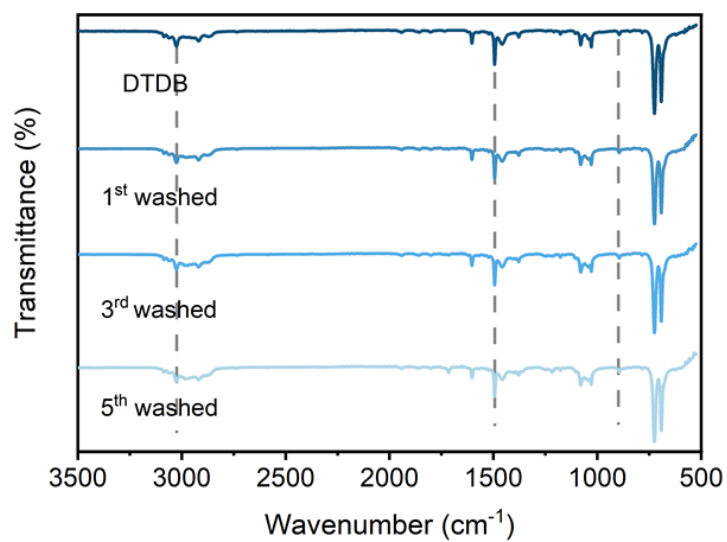

**Fig. S6** FTIR spectra of DTDB-CspbBr<sub>3</sub> NCs and DTDB ligand.

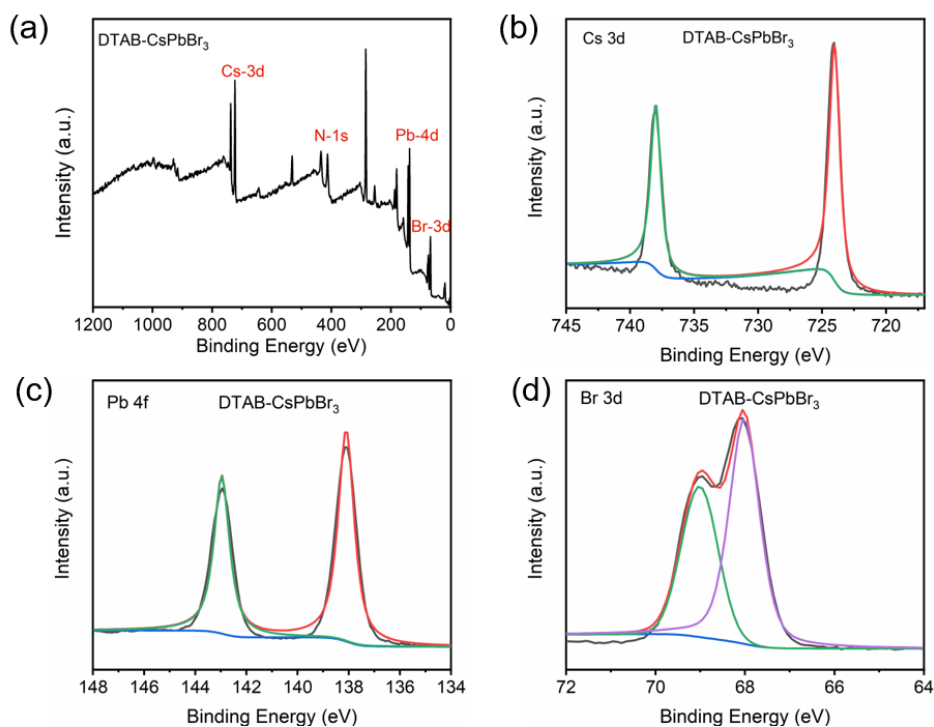

**Fig. S7** (a) XPS spectra of DTAB-CsPbBr<sub>3</sub> NCs. High-resolution XPS spectra corresponding to (b) Cs 3d, (c) Pb 4f and (d) Br 3d.

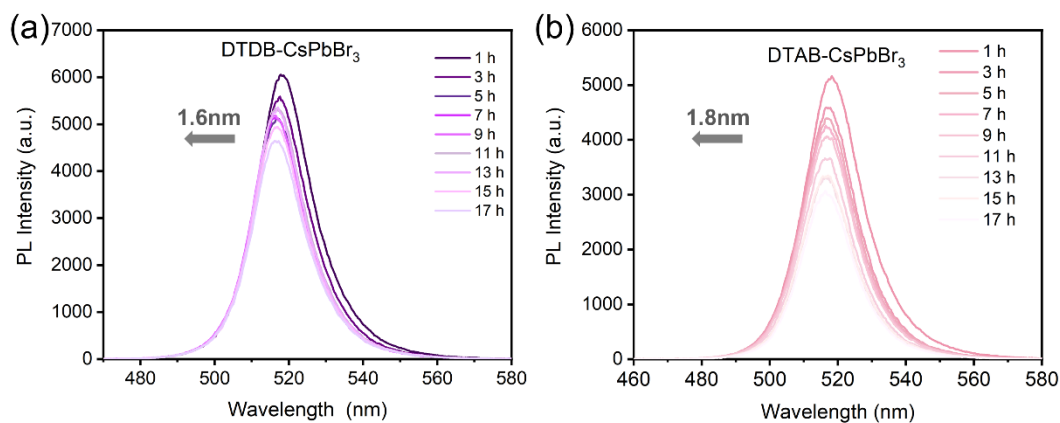

**Fig. S8** (a) Corresponding PL spectra of DTDB-CsPbBr<sub>3</sub> and (b) DTAB-CsPbBr<sub>3</sub> NCs during water resistance tests.
